# Supplementary material
Source: Springer Nature journal article supplement (https://www.springermedizin.de/resource/supplementary/13256_2013_2785_MOESM1_ESM.pdf/9650502)

Ab: 4  
Um: 9  
Cor P3.9

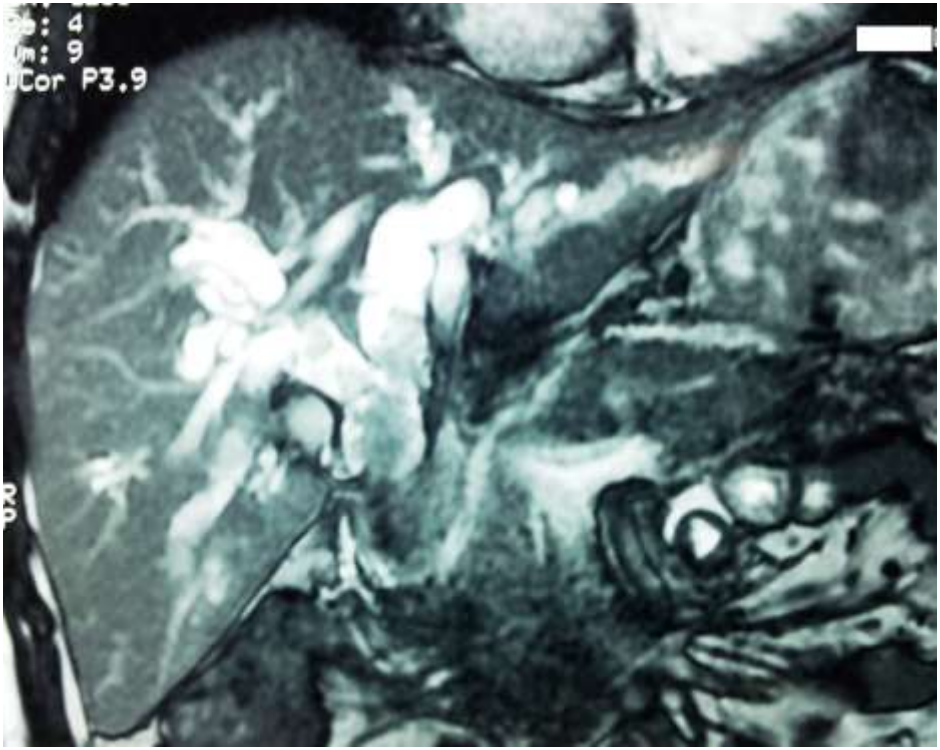

0.20

Supplement: MOESM1 [file 9650502]
